# Supplementary material for: A phenomenology of new particle formation (NPF) at 13 European sites
Source: Copernicus journal article supplement (doi:10.5194/acp-21-11905-2021), 2021-08-10
Supplement: Supplementary file [file acp-21-11905-2021-supplement.pdf]

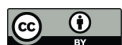

*Supplement of*

## **A phenomenology of new particle formation (NPF) at 13 European sites**

**Dimitrios Bousiotis et al.**

*Correspondence to:* Roy M. Harrison (r.m.harrison@bham.ac.uk)

The copyright of individual parts of the supplement might differ from the article licence.

14 **Table S1:** Data availability per season.

| Sites | Winter | Spring | Summer | Autumn | Total |
|-------|--------|--------|--------|--------|-------|
| DENRU | 80.4%  | 70.0%  | 55.2%  | 56.5%  | 65.4% |
| DENUB | 67.3%  | 78.0%  | 46.6%  | 44.3%  | 59.0% |
| DENRO | 69.8%  | 80.1%  | 53.7%  | 57.5%  | 65.0% |
| GERRU | 84.1%  | 82.1%  | 91.1%  | 91.3%  | 87.1% |
| GERUB | 77.8%  | 83.2%  | 94.3%  | 96.6%  | 88.0% |
| GERRO | 67.1%  | 33.3%  | 78.7%  | 78.7%  | 64.4% |
| FINRU | 98.6%  | 99.1%  | 98.4%  | 98.7%  | 98.7% |
| FINUB | 97.4%  | 97.9%  | 88.5%  | 92.4%  | 94.0% |
| FINRO | 87.4%  | 73.2%  | 99.7%  | 99.3%  | 90.0% |
| SPARU | 42.3%  | 40.6%  | 55.4%  | 53.2%  | 47.7% |
| SPAUB | 62.6%  | 58.5%  | 55.6%  | 80.7%  | 64.2% |
| GRERU | 83.1%  | 85.4%  | 99.8%  | 99.2%  | 92.4% |
| GREUB | 70.0%  | 72.5%  | 77.1%  | 89.3%  | 77.2% |

15

16

17

18 **Table S2:** Meteorological conditions and condensation sink on average (upper) and NPF event days  
 19 (lower).

20

| Site  | Temperature (°C) | Solar radiation (W m <sup>-2</sup> ) | Wind speed (m s <sup>-1</sup> ) | Relative humidity (%) | Condensation sink (s <sup>-1</sup> ) |
|-------|------------------|--------------------------------------|---------------------------------|-----------------------|--------------------------------------|
| DENRU | 9.80 ± 6.75      | 115 ± 98.0                           | 4.17 ± 1.49                     | 75.7 ± 11.7           | 9.46E-03 ± 6.56E-03                  |
| DENUB | 9.82 ± 6.76      | 115 ± 98.0                           | 4.17 ± 1.49                     | 75.7 ± 11.7           | 1.42E-02 ± 8.80E-03                  |
| DENRO | 10.0 ± 6.68      | 117 ± 98.5                           | 4.16 ± 1.48                     | 75.7 ± 11.4           | 3.10E-02 ± 1.79E-02                  |
| GERRU | 10.3 ± 7.83      | 130 ± 94.0                           | 2.58 ± 1.32                     | 81.9 ± 10.4           | 7.02E-03 ± 3.54E-03                  |
| GERUB | 11.1 ± 8.37      | 114 ± 86.3                           | 2.33 ± 0.84                     | 78.7 ± 14.7           | 9.11E-03 ± 4.48E-03                  |
| GERRO | 11.1 ± 8.37      | 114 ± 86.3                           | 2.33 ± 0.84                     | 78.7 ± 14.7           | 1.20E-02 ± 5.58E-03                  |
| FINRU | 4.79 ± 8.79      | 91 ± 89.0                            | 1.31 ± 0.86                     | 80.1 ± 15.7           | 2.32E-03 ± 1.25E-03                  |
| FINUB | 6.52 ± 8.34      | 111 ± 110                            | 3.43 ± 1.53                     | 76.5 ± 13.9           | 6.34E-03 ± 3.20E-02                  |
| FINRO | 7.72 ± 7.55      | 114 ± 103                            | 4.26 ± 1.44                     | 71.1 ± 11.4           | 8.96E-03 ± 3.70E-02                  |
| SPARU | 13.9 ± 6.27      | 162 ± 82.3                           | 0.94 ± 0.56                     | 66.4 ± 15.6           | 5.49E-03 ± 2.70E-03                  |
| SPAUB | 18.2 ± 5.68      | 180 ± 93.3                           | 2.05 ± 0.99                     | 69.2 ± 11.7           | 1.00E-02 ± 4.00E-03                  |
| GRERU | 18.2 ± 6.01      | 201 ± 104                            | 6.06 ± 3.38                     | 70.0 ± 8.59           | 4.66E-03 ± 2.08E-03                  |
| GREUB | 17.6 ± 7.37      | 183 ± 92.3                           | 1.87 ± 0.74                     | 60.5 ± 15.5           | 7.55E-03 ± 3.23E-03                  |

21

| Site  | Temperature (°C) | Solar radiation (W m <sup>-2</sup> ) | Wind speed (m s <sup>-1</sup> ) | Relative humidity (%) | Condensation sink (s <sup>-1</sup> ) |
|-------|------------------|--------------------------------------|---------------------------------|-----------------------|--------------------------------------|
| DENRU | 13.5 ± 4.61      | 218 ± 71.0                           | 4.29 ± 1.31                     | 65.1 ± 9.38           | 8.67E-03 ± 5.46E-03                  |
| DENUB | 13.4 ± 5.17      | 206 ± 76.4                           | 4.59 ± 1.43                     | 64.6 ± 9.96           | 1.12E-02 ± 5.80E-03                  |
| DENRO | 13.6 ± 4.82      | 226 ± 78.5                           | 4.49 ± 1.33                     | 66.2 ± 8.48           | 2.66E-02 ± 1.41E-02                  |
| GERRU | 15.4 ± 5.90      | 229 ± 68.3                           | 2.05 ± 0.98                     | 71.2 ± 7.75           | 8.61E-03 ± 2.98E-03                  |
| GERUB | 17.6 ± 5.66      | 215 ± 60.6                           | 2.08 ± 0.71                     | 62.0 ± 10.5           | 9.96E-03 ± 3.86E-03                  |
| GERRO | 18.7 ± 6.44      | 217 ± 65.70                          | 1.96 ± 0.62                     | 60.6 ± 11.1           | 1.42E-02 ± 4.51E-03                  |
| FINRU | 3.48 ± 6.74      | 149 ± 80.8                           | 1.44 ± 0.93                     | 64.8 ± 14.6           | 2.15E-03 ± 9.52E-03                  |
| FINUB | 5.32 ± 5.44      | 150 ± 85.5                           | 3.28 ± 1.42                     | 62.0 ± 13.3           | 4.33E-03 ± 2.01E-03                  |
| FINRO | 11.6 ± 6.28      | 169 ± 91.9                           | 4.47 ± 1.46                     | 64.2 ± 14.0           | 6.89E-03 ± 2.62E-03                  |
| SPARU | 12.0 ± 4.71      | 169 ± 67.3                           | 1.00 ± 0.47                     | 59.2 ± 13.4           | 4.68E-03 ± 2.34E-03                  |
| SPAUB | 17.7 ± 5.29      | 196 ± 76.2                           | 2.58 ± 1.04                     | 57.9 ± 10.3           | 8.45E-03 ± 3.57E-03                  |
| GRERU | 18.1 ± 4.99      | 233 ± 91.5                           | 6.49 ± 3.33                     | 67.6 ± 7.98           | 4.80E-03 ± 1.73E-03                  |
| GREUB | 16.8 ± 7.50      | 192 ± 74.9                           | 1.79 ± 0.72                     | 54.6 ± 12.0           | 9.31E-03 ± 3.49E-03                  |

22

23

24 **Table S3:** Average (top panel) and NPF event day (lower panel) concentrations of chemical  
 25 components (\*refers to NO<sub>2</sub>, +refers to Organic Mass in PM<sub>1</sub> measurements, \*refers to measurements  
 26 at the Kalio site).

| Site  | NO <sub>x</sub> /NO <sub>2</sub> (µg m <sup>-3</sup> ) | SO <sub>2</sub> (µg m <sup>-3</sup> ) | O <sub>3</sub> (µg m <sup>-3</sup> ) | Organic carbon (PM <sub>2.5</sub> )<br>(µg m <sup>-3</sup> ) | Sulphate (PM <sub>2.5</sub> )<br>(µg m <sup>-3</sup> ) |
|-------|--------------------------------------------------------|---------------------------------------|--------------------------------------|--------------------------------------------------------------|--------------------------------------------------------|
| DENRU | 5.42 ± 4.55                                            | 0.26 ± 0.37                           | 30.1 ± 9.32                          | 1.48 ± 1.37                                                  | 0.52 ± 0.46                                            |
| DENUB | 10.5 ± 6.24                                            | -                                     | 28.2 ± 9.36                          | -                                                            | -                                                      |
| DENRO | 68.5 ± 30.4                                            | 0.97 ± 0.78                           | 31.1 ± 7.13                          | 2.59 ± 1.81                                                  | 0.55 ± 0.50                                            |
| GERRU | -                                                      | -                                     | -                                    | 2.18 ± 2.08                                                  | 0.83 ± 0.12                                            |
| GERUB | -                                                      | -                                     | -                                    | -                                                            | -                                                      |
| GERRO | -                                                      | -                                     | -                                    | -                                                            | -                                                      |
| FINRU | 0.72 ± 0.55                                            | 0.09 ± 0.16                           | 27.4 ± 8.07                          | 1.78 ± 1.24 <sup>+</sup>                                     | 1.02 ± 0.82                                            |
| FINUB | -                                                      | -                                     | -                                    | -                                                            | -                                                      |
| FINRO | 88.1 ± 54.4                                            | 0.93 ± 1.27*                          | 37.1 ± 14.0                          | -                                                            | -                                                      |
| SPARU | 3.26 ± 2.46*                                           | 0.95 ± 0.57                           | 75.9 ± 20.0                          | 2.69 ± 1.34                                                  | 1.21 ± 0.97                                            |
| SPAUB | 31.4 ± 14.2*                                           | 1.99 ± 0.88                           | 54.9 ± 19.0                          | -                                                            | -                                                      |
| GRERU | 0.52 ± 0.22*                                           | -                                     | 49.5 ± 8.61                          | 1.58 ± 0.97                                                  | -                                                      |
| GREUB | -                                                      | -                                     | -                                    | -                                                            | -                                                      |

27

| Site  | NO <sub>x</sub> /NO <sub>2</sub> (µg m <sup>-3</sup> ) | SO <sub>2</sub> (µg m <sup>-3</sup> ) | O <sub>3</sub> (µg m <sup>-3</sup> ) | Organic carbon (PM <sub>2.5</sub> )<br>(µg m <sup>-3</sup> ) | Sulphate (PM <sub>2.5</sub> )<br>(µg m <sup>-3</sup> ) |
|-------|--------------------------------------------------------|---------------------------------------|--------------------------------------|--------------------------------------------------------------|--------------------------------------------------------|
| DENRU | 2.59 ± 1.64                                            | 0.18 ± 0.19                           | 37.0 ± 6.10                          | 0.74 ± 0.45                                                  | 0.33 ± 0.15                                            |
| DENUB | 6.55 ± 2.77                                            | -                                     | 35.5 ± 5.54                          | -                                                            | -                                                      |
| DENRO | 53.9 ± 22.7                                            | 0.66 ± 0.54                           | 36.3 ± 4.09                          | 2.13 ± 0.87                                                  | 0.34 ± 0.18                                            |
| GERRU | -                                                      | -                                     | -                                    | 1.83 ± 0.98                                                  | 0.69 ± 0.28                                            |
| GERUB | -                                                      | -                                     | -                                    | -                                                            | -                                                      |
| GERRO | -                                                      | -                                     | -                                    | -                                                            | -                                                      |
| FINRU | 0.50 ± 0.42                                            | 0.13 ± 0.20                           | 33.8 ± 7.12                          | 1.21 ± 0.63 <sup>+</sup>                                     | 0.66 ± 0.45                                            |
| FINUB | -                                                      | -                                     | -                                    | -                                                            | -                                                      |
| FINRO | 52.9 ± 31.6                                            | 0.66 ± 0.60*                          | 45.1 ± 16.0                          | -                                                            | -                                                      |
| SPARU | 3.27 ± 3.39*                                           | 0.96 ± 0.71                           | 78.1 ± 15.0                          | 1.47 ± 0.76                                                  | 0.53 ± 0.68                                            |
| SPAUB | 25.4 ± 12.7*                                           | 1.95 ± 0.81                           | 59.6 ± 16.2                          | -                                                            | -                                                      |
| GRERU | 0.56 ± 0.28*                                           | -                                     | 50.8 ± 7.48                          | 1.46 ± 0.74                                                  | -                                                      |
| GREUB | -                                                      | -                                     | -                                    | -                                                            | -                                                      |

28

29

30

31 **Table S4:** Seasonal meteorological conditions and chemical compound concentrations.

| <b>DENRU</b> | Solar radiation (W m <sup>-2</sup> ) | Wind speed (m s <sup>-1</sup> ) | Temperature (°C) | Relative humidity (%) | NO <sub>x</sub> (µg m <sup>-3</sup> ) | O <sub>3</sub> (µg m <sup>-3</sup> ) | Organic carbon (PM <sub>2.5</sub> ) (µg m <sup>-3</sup> ) | Condensation sink (s <sup>-1</sup> ) |
|--------------|--------------------------------------|---------------------------------|------------------|-----------------------|---------------------------------------|--------------------------------------|-----------------------------------------------------------|--------------------------------------|
| Winter       | 24                                   | 4.60                            | 2.26             | 82.2                  | 7.29                                  | 25.5                                 | 1.99                                                      | 8.34E-03                             |
| Spring       | 163                                  | 4.06                            | 8.69             | 69.4                  | 5.07                                  | 36.3                                 | 1.43                                                      | 1.09E-02                             |
| Summer       | 210                                  | 3.80                            | 17.8             | 70.7                  | 3.16                                  | 34.9                                 | 1.10                                                      | 1.07E-02                             |
| Autumn       | 68                                   | 4.21                            | 10.8             | 80.0                  | 6.09                                  | 24.2                                 | 1.43                                                      | 8.03E-03                             |

32

| <b>DENUB</b> | Solar radiation (W m <sup>-2</sup> ) | Wind speed (m s <sup>-1</sup> ) | Temperature (°C) | Relative humidity (%) | NO <sub>x</sub> (µg m <sup>-3</sup> ) | O <sub>3</sub> (µg m <sup>-3</sup> ) | Condensation sink (s <sup>-1</sup> ) |
|--------------|--------------------------------------|---------------------------------|------------------|-----------------------|---------------------------------------|--------------------------------------|--------------------------------------|
| Winter       | 24                                   | 4.62                            | 2.19             | 82.2                  | 12.08                                 | 22.7                                 | 1.37E-02                             |
| Spring       | 163                                  | 4.06                            | 8.69             | 69.4                  | 10.12                                 | 34.1                                 | 1.45E-02                             |
| Summer       | 210                                  | 3.80                            | 17.8             | 70.7                  | 8.25                                  | 33.5                                 | 1.61E-02                             |
| Autumn       | 68                                   | 4.21                            | 10.8             | 80.0                  | 11.71                                 | 22.2                                 | 1.25E-02                             |

33

| <b>DENRO</b> | Solar radiation (W m <sup>-2</sup> ) | Wind speed (m s <sup>-1</sup> ) | Temperature (°C) | Relative humidity (%) | SO <sub>2</sub> (µg m <sup>-3</sup> ) | NO <sub>x</sub> (µg m <sup>-3</sup> ) | O <sub>3</sub> (µg m <sup>-3</sup> ) | Organic carbon (PM <sub>2.5</sub> ) (µg m <sup>-3</sup> ) | Condensation sink (s <sup>-1</sup> ) |
|--------------|--------------------------------------|---------------------------------|------------------|-----------------------|---------------------------------------|---------------------------------------|--------------------------------------|-----------------------------------------------------------|--------------------------------------|
| Winter       | 23                                   | 4.61                            | 2.40             | 82.6                  | 0.90                                  | 68.99                                 | 32.4                                 | 2.84                                                      | 3.19E-02                             |
| Spring       | 166                                  | 4.04                            | 8.91             | 69.4                  | 0.79                                  | 65.07                                 | 28.8                                 | 2.44                                                      | 2.96E-02                             |
| Summer       | 210                                  | 3.80                            | 17.8             | 70.7                  | 0.94                                  | 61.40                                 | 31.2                                 | 2.19                                                      | 3.08E-02                             |
| Autumn       | 68                                   | 4.21                            | 10.8             | 80.0                  | 1.24                                  | 78.45                                 | 32.0                                 | 2.89                                                      | 3.21E-02                             |

34

| <b>GERRU</b> | Solar radiation (W m <sup>-2</sup> ) | Wind speed (m s <sup>-1</sup> ) | Temperature (°C) | Relative humidity (%) | Organic carbon (PM <sub>2.5</sub> ) (µg m <sup>-3</sup> ) | Condensation sink (s <sup>-1</sup> ) |
|--------------|--------------------------------------|---------------------------------|------------------|-----------------------|-----------------------------------------------------------|--------------------------------------|
| Winter       | 39                                   | 2.94                            | 0.69             | 89.6                  | 3.37                                                      | 7.94E-03                             |
| Spring       | 164                                  | 2.68                            | 9.83             | 79.1                  | 2.01                                                      | 7.03E-03                             |
| Summer       | 215                                  | 2.12                            | 19.0             | 74.8                  | 1.44                                                      | 6.92E-03                             |
| Autumn       | 85                                   | 2.62                            | 10.3             | 85.3                  | 1.81                                                      | 6.28E-03                             |

35

36

| <b>GERUB</b> | Solar radiation (W m <sup>-2</sup> ) | Wind speed (m s <sup>-1</sup> ) | Temperature (°C) | Relative humidity (%) | Condensation sink (s <sup>-1</sup> ) |
|--------------|--------------------------------------|---------------------------------|------------------|-----------------------|--------------------------------------|
| Winter       | 39                                   | 2.94                            | 0.69             | 89.6                  | 1.12E-02                             |
| Spring       | 164                                  | 2.68                            | 9.83             | 79.1                  | 7.63E-03                             |
| Summer       | 215                                  | 2.12                            | 19.0             | 74.8                  | 8.58E-03                             |
| Autumn       | 85                                   | 2.62                            | 10.3             | 85.3                  | 9.19E-03                             |

37

| <b>GERRO</b> | Solar radiation (W m <sup>-2</sup> ) | Wind speed (m s <sup>-1</sup> ) | Temperature (°C) | Relative humidity (%) | Condensation sink (s <sup>-1</sup> ) |
|--------------|--------------------------------------|---------------------------------|------------------|-----------------------|--------------------------------------|
| Winter       | 30                                   | 2.45                            | 0.52             | 92.3                  | 1.42E-02                             |
| Spring       | 150                                  | 2.42                            | 11.1             | 74.2                  | 1.16E-02                             |
| Summer       | 194                                  | 2.19                            | 20.2             | 66.1                  | 1.16E-02                             |
| Autumn       | 70                                   | 2.27                            | 11.0             | 83.5                  | 1.11E-02                             |

38

| <b>FINRU</b> | Solar radiation (W m <sup>-2</sup> ) | Wind speed (m s <sup>-1</sup> ) | Temperature (°C) | Relative humidity (%) | SO <sub>2</sub> (µg m <sup>-3</sup> ) | NO <sub>x</sub> (µg m <sup>-3</sup> ) | O <sub>3</sub> (µg m <sup>-3</sup> ) | Organic carbon (PM <sub>1</sub> ) (µg m <sup>-3</sup> ) | Condensation sink (s <sup>-1</sup> ) |
|--------------|--------------------------------------|---------------------------------|------------------|-----------------------|---------------------------------------|---------------------------------------|--------------------------------------|---------------------------------------------------------|--------------------------------------|
| Winter       | 12                                   | 1.34                            | -5.56            | 93.1                  | 0.14                                  | 1.14                                  | 27.3                                 | NA                                                      | 1.84E-03                             |
| Spring       | 131                                  | 1.34                            | 3.74             | 72.0                  | 0.12                                  | 0.69                                  | 35.5                                 | 1.52                                                    | 2.52E-03                             |
| Summer       | 179                                  | 1.24                            | 14.5             | 71.4                  | 0.05                                  | 0.37                                  | 26.0                                 | 4.69                                                    | 2.94E-03                             |
| Autumn       | 43                                   | 1.31                            | 4.36             | 86.8                  | 0.05                                  | 0.81                                  | 20.7                                 | 1.81                                                    | 1.85E-03                             |

39

| <b>FINUB</b> | Solar radiation (W m <sup>-2</sup> ) | Wind speed (m s <sup>-1</sup> ) | Temperature (°C) | Relative humidity (%) | Condensation sink (s <sup>-1</sup> ) |
|--------------|--------------------------------------|---------------------------------|------------------|-----------------------|--------------------------------------|
| Winter       | 17                                   | 3.76                            | -2.54            | 84.5                  | 5.97E-03                             |
| Spring       | 158                                  | 3.25                            | 5.35             | 70.0                  | 8.59E-03                             |
| Summer       | 213                                  | 3.18                            | 16.2             | 70.0                  | 5.79E-03                             |
| Autumn       | 55                                   | 3.52                            | 6.94             | 81.7                  | 4.84E-03                             |

40

41

| <b>FINRO</b> | Solar radiation (W m <sup>-2</sup> ) | Wind speed (m s <sup>-1</sup> ) | Temperature (°C) | Relative humidity (%) | SO <sub>2</sub> * (µg m <sup>-3</sup> ) | NO <sub>x</sub> (µg m <sup>-3</sup> ) | O <sub>3</sub> (µg m <sup>-3</sup> ) | Condensation sink (s <sup>-1</sup> ) |
|--------------|--------------------------------------|---------------------------------|------------------|-----------------------|-----------------------------------------|---------------------------------------|--------------------------------------|--------------------------------------|
| Winter       | 17                                   | 4.65                            | -0.68            | 77.2                  | 1.35                                    | 102.34                                | 32.9                                 | 8.67E-03                             |
| Spring       | 156                                  | 4.10                            | 6.16             | 65.1                  | 1.11                                    | 85.28                                 | 46.6                                 | 8.94E-03                             |
| Summer       | 212                                  | 3.98                            | 16.3             | 67.2                  | 0.69                                    | 77.13                                 | 39.6                                 | 9.39E-03                             |
| Autumn       | 56                                   | 4.37                            | 7.53             | 76.0                  | 0.64                                    | 89.79                                 | 28.4                                 | 8.76E-03                             |

42 \*SO<sub>2</sub> data are from the nearby Kalio station

43

| <b>SPARU</b> | Solar radiation (W m <sup>-2</sup> ) | Wind speed (m s <sup>-1</sup> ) | Temperature (°C) | Relative humidity (%) | SO <sub>2</sub> (µg m <sup>-3</sup> ) | NO <sub>x</sub> (µg m <sup>-3</sup> ) | O <sub>3</sub> (µg m <sup>-3</sup> ) | Condensation sink (s <sup>-1</sup> ) |
|--------------|--------------------------------------|---------------------------------|------------------|-----------------------|---------------------------------------|---------------------------------------|--------------------------------------|--------------------------------------|
| Winter       | 94                                   | 0.83                            | 6.87             | 62.3                  | 0.86                                  | 3.89                                  | 61.5                                 | 3.60E-03                             |
| Spring       | 179                                  | 1.03                            | 11.6             | 68.6                  | 1.06                                  | 3.21                                  | 83.1                                 | 5.04E-03                             |
| Summer       | 234                                  | 0.97                            | 20.6             | 63.2                  | 0.89                                  | 2.86                                  | 91.2                                 | 7.67E-03                             |
| Autumn       | 129                                  | 0.90                            | 15.3             | 71.4                  | 1.02                                  | 2.99                                  | 66.9                                 | 5.00E-03                             |

44

| <b>SPAUB</b> | Solar radiation (W m <sup>-2</sup> ) | Wind speed (m s <sup>-1</sup> ) | Temperature (°C) | Relative humidity (%) | SO <sub>2</sub> (µg m <sup>-3</sup> ) | NO <sub>x</sub> (µg m <sup>-3</sup> ) | O <sub>3</sub> (µg m <sup>-3</sup> ) | Organic carbon (PM <sub>2.5</sub> ) (µg m <sup>-3</sup> ) | Condensation sink (s <sup>-1</sup> ) |
|--------------|--------------------------------------|---------------------------------|------------------|-----------------------|---------------------------------------|---------------------------------------|--------------------------------------|-----------------------------------------------------------|--------------------------------------|
| Winter       | 96                                   | 2.32                            | 11.6             | 65.7                  | 1.50                                  | 35.05                                 | 39.9                                 | 4.23                                                      | 9.29E-03                             |
| Spring       | 220                                  | 2.22                            | 15.9             | 69.5                  | 1.86                                  | 30.73                                 | 63.0                                 | 3.67                                                      | 1.00E-02                             |
| Summer       | 277                                  | 1.81                            | 24.8             | 68.6                  | 2.67                                  | 26.07                                 | 70.6                                 | 4.05                                                      | 9.91E-03                             |
| Autumn       | 143                                  | 1.93                            | 20.0             | 72.3                  | 1.91                                  | 33.27                                 | 48.4                                 | 3.96                                                      | 1.06E-02                             |

45

| <b>GRERU</b> | Solar radiation (W m <sup>-2</sup> ) | Wind speed (m s <sup>-1</sup> ) | Temperature (°C) | Relative humidity (%) | NO <sub>x</sub> (µg m <sup>-3</sup> ) | O <sub>3</sub> (µg m <sup>-3</sup> ) | Organic carbon (PM <sub>2.5</sub> ) (µg m <sup>-3</sup> ) | Condensation sink (s <sup>-1</sup> ) |
|--------------|--------------------------------------|---------------------------------|------------------|-----------------------|---------------------------------------|--------------------------------------|-----------------------------------------------------------|--------------------------------------|
| Winter       | 100                                  | 6.29                            | 13.2             | 71.9                  | 0.59                                  | 40.8                                 | 1.36                                                      | 2.95E-03                             |
| Spring       | 239                                  | 5.21                            | 17.1             | 69.5                  | 0.58                                  | 51.6                                 | 1.53                                                      | 4.04E-03                             |
| Summer       | 301                                  | 7.33                            | 23.9             | 67.4                  | 0.48                                  | 58.0                                 | 2.16                                                      | 6.38E-03                             |
| Autumn       | 161                                  | 5.67                            | 19.7             | 71.4                  | 0.50                                  | 46.5                                 | 1.51                                                      | 4.33E-03                             |

46

47

| <b>GREUB</b> | Solar radiation<br>(W m <sup>-2</sup> ) | Wind speed<br>(m s <sup>-1</sup> ) | Temperature<br>(°C) | Relative humidity<br>(%) | Condensation sink<br>(s <sup>-1</sup> ) |
|--------------|-----------------------------------------|------------------------------------|---------------------|--------------------------|-----------------------------------------|
| Winter       | 88                                      | 1.86                               | 9.30                | 71.9                     | 8.81E-03                                |
| Spring       | 215                                     | 1.96                               | 15.9                | 59.2                     | 8.02E-03                                |
| Summer       | 282                                     | 2.00                               | 26.5                | 46.0                     | 6.93E-03                                |
| Autumn       | 144                                     | 1.68                               | 18.5                | 65.2                     | 6.73E-03                                |

48

49



50 **Table S5:** NPF probability (and number of NPF events) per season.

| Sites | Winter     | Spring      | Summer      | Autumn     | Total |
|-------|------------|-------------|-------------|------------|-------|
| DENRU | 0% (0)     | 10.3% (62)  | 20.5% (100) | 2.9% (14)  | 176   |
| DENUB | 0% (0)     | 9.9% (67)   | 9.6% (39)   | 2.6% (10)  | 116   |
| DENRO | 0.2% (1)   | 5.9% (39)   | 13.9% (65)  | 2.4% (12)  | 117   |
| GERRU | 2.1% (5)   | 24.3% (57)  | 31.4% (81)  | 8.2% (21)  | 164   |
| GERUB | 0% (0)     | 27.6% (64)  | 30.7% (82)  | 8.6% (23)  | 169   |
| GERRO | 1.1% (2)   | 9.8% (9)    | 18.0% (40)  | 5.0% (11)  | 62    |
| FINRU | 2.8% (15)  | 21.2% (113) | 4.4% (24)   | 7.1% (38)  | 190   |
| FINUB | 1.5% (8)   | 10.9% (60)  | 1.3% (7)    | 6.2% (34)  | 109   |
| FINRO | 2.0% (4)   | 4.8% (10)   | 8.3% (23)   | 4.4% (12)  | 49    |
| SPARU | 14.0% (19) | 22.8% (34)  | 5.6% (9)    | 4.2% (6)   | 68    |
| SPAUB | 9.1% (19)  | 12.5% (23)  | 8.0% (17)   | 15.5% (38) | 97    |
| GRERU | 5.6% (18)  | 11.6% (54)  | 4.2% (23)   | 4.7% (21)  | 116   |
| GREUB | 8.1% (18)  | 10.6% (26)  | 5.5% (13)   | 9.6% (25)  | 82    |

51

52

53 **Table S6:** Annual number of NPF events, growth rate and formation rate.  
54

|       | 2008 | 2009 | 2010 | 2011 | 2012 | 2013 | 2014 | 2015 | 2016 | 2017 |
|-------|------|------|------|------|------|------|------|------|------|------|
| DENRU | 11   | 15   | 22   | 16   | 18   | 24   | 19   | 27   | 24   | NA   |
| DEBUB | 10   | 7    | 11   | 6    | 34   | 15   | 17   | 11   | 5    | NA   |
| DENRO | 14   | 13   | 7    | 12   | 16   | 11   | 16   | 22   | 6    | NA   |
| GERRU | 63   | 55   | 46   | NA   | NA   | NA   | NA   | NA   | NA   | NA   |
| GERUB | 50   | 63   | 56   | NA   | NA   | NA   | NA   | NA   | NA   | NA   |
| GERRO | 15   | 17   | 30   | NA   | NA   | NA   | NA   | NA   | NA   | NA   |
| FINRU | 33   | 41   | 27   | NA   | NA   | NA   | NA   | 34   | 27   | 28   |
| FINUB | 21   | 34   | 12   | NA   | NA   | NA   | NA   | 19   | 8    | 15   |
| FINRO | NA   | NA   | NA   | NA   | NA   | NA   | NA   | 21   | 15   | 13   |
| SPARU | NA   | NA   | NA   | NA   | 35   | 3    | 30   | NA   | NA   | NA   |
| SPAUB | NA   | NA   | NA   | NA   | 23   | 43   | 31   | NA   | NA   | NA   |
| GRERU | NA   | NA   | NA   | NA   | 13   | 17   | 14   | 11   | 23   | 38   |
| GREUB | NA   | NA   | NA   | NA   | NA   | NA   | NA   | 37   | 27   | 18   |

55

|       | 2008 | 2009 | 2010 | 2011 | 2012 | 2013 | 2014 | 2015 | 2016 | 2017 |
|-------|------|------|------|------|------|------|------|------|------|------|
| DENRU | 3.03 | 3.47 | 3.9  | 2.79 | 3.04 | 3.45 | 2.93 | 2.97 | 2.98 | NA   |
| DEBUB | 3.51 | 3.25 | 2.7  | 2.46 | 3.44 | 3.2  | 3.39 | 2.82 | 2.96 | NA   |
| DENRO | 4.2  | 4.68 | 3.49 | 4.16 | 3.91 | 5.88 | 4.66 | 4.48 | 4.36 | NA   |
| GERRU | 4.08 | 4.5  | 4.5  | NA   | NA   | NA   | NA   | NA   | NA   | NA   |
| GERUB | 4.39 | 4.04 | 4.34 | NA   | NA   | NA   | NA   | NA   | NA   | NA   |
| GERRO | 4.68 | 5.95 | 4.96 | NA   | NA   | NA   | NA   | NA   | NA   | NA   |
| FINRU | 3.13 | 3.05 | 2.72 | NA   | NA   | NA   | NA   | 3.34 | 2.52 | 2.5  |
| FINUB | 3.21 | 2.89 | 2.94 | NA   | NA   | NA   | NA   | 2.63 | 2.83 | 2.65 |
| FINRO | NA   | NA   | NA   | NA   | NA   | NA   | NA   | 3.56 | 3.89 | 3.86 |
| SPARU | NA   | NA   | NA   | NA   | 3.37 | 2.41 | 4.05 | NA   | NA   | NA   |
| SPAUB | NA   | NA   | NA   | NA   | 4.03 | 3.55 | 2.69 | NA   | NA   | NA   |
| GRERU | NA   | NA   | NA   | NA   | 4.92 | 2.97 | 3.16 | 3.04 | 4.76 | 3.61 |
| GREUB | NA   | NA   | NA   | NA   | NA   | NA   | NA   | 3.61 | 3.56 | 3.98 |

56

|       | 2008     | 2009     | 2010     | 2011     | 2012     | 2013     | 2014     | 2015     | 2016     | 2017     |
|-------|----------|----------|----------|----------|----------|----------|----------|----------|----------|----------|
| DENRU | 2.15E-02 | 3.39E-02 | 2.34E-02 | 1.48E-02 | 1.89E-02 | 2.80E-02 | 1.76E-02 | 2.26E-02 | 3.25E-02 | NA       |
| DEBUB | 2.16E-02 | 2.62E-02 | 1.94E-02 | 1.00E-02 | 2.98E-02 | 1.77E-02 | 1.62E-02 | 1.94E-02 | 1.08E-02 | NA       |
| DENRO | 1.12E-01 | 9.07E-02 | 5.80E-02 | 7.48E-02 | 6.66E-02 | 8.81E-02 | 6.89E-02 | 8.07E-02 | 5.28E-02 | NA       |
| GERRU | 8.46E-02 | 1.03E-01 | 8.85E-02 | NA       | NA       | NA       | NA       | NA       | NA       | NA       |
| GERUB | 1.13E-01 | 8.30E-02 | 1.14E-01 | NA       | NA       | NA       | NA       | NA       | NA       | NA       |
| GERRO | 9.17E-02 | 1.63E-01 | 1.46E-01 | NA       | NA       | NA       | NA       | NA       | NA       | NA       |
| FINRU | 7.85E-03 | 1.29E-02 | 7.19E-03 | NA       | NA       | NA       | NA       | 1.48E-02 | 9.38E-03 | 1.24E-02 |
| FINUB | 1.99E-02 | 1.91E-02 | 2.53E-02 | NA       | NA       | NA       | NA       | 2.99E-02 | 1.82E-02 | 2.75E-02 |
| FINRO | NA       | NA       | NA       | NA       | NA       | NA       | NA       | 6.83E-02 | 5.82E-02 | 8.35E-02 |
| SPARU | NA       | NA       | NA       | NA       | 1.69E-02 | 7.33E-03 | 1.46E-02 | NA       | NA       | NA       |
| SPAUB | NA       | NA       | NA       | NA       | 1.12E-02 | 2.65E-02 | 2.12E-02 | NA       | NA       | NA       |
| GRERU | NA       | NA       | NA       | NA       | 2.18E-03 | 4.01E-03 | 5.30E-03 | 3.43E-03 | 7.67E-03 | 4.85E-03 |
| GREUB | NA       | NA       | NA       | NA       | NA       | NA       | NA       | 3.06E-02 | 5.15E-02 | 6.09E-02 |

59 **Table S7:** Average conditions as a function of incoming wind direction at each site.

60

| DENRU | WS (m s <sup>-1</sup> ) | RH (%) | T (°C) | CS (s <sup>-1</sup> ) | OC (µg m <sup>-3</sup> ) | NPF probability (%) | GR (nm h <sup>-1</sup> ) | J <sub>10</sub> (N cm <sup>-3</sup> s <sup>-1</sup> ) |
|-------|-------------------------|--------|--------|-----------------------|--------------------------|---------------------|--------------------------|-------------------------------------------------------|
| N     | 3.45                    | 72.8   | 7.85   | 6.62E-03              | 1.35                     | 2.88%               | 3.47                     | 9.58E-03                                              |
| NE    | 3.92                    | 74.2   | 8.35   | 9.57E-03              | 1.81                     | 3.19%               | 3.30                     | 2.21E-02                                              |
| E     | 3.93                    | 74.2   | 9.19   | 1.20E-02              | 2.41                     | 2.33%               | 3.27                     | 2.24E-02                                              |
| SE    | 3.92                    | 74.1   | 10.5   | 1.35E-02              | 2.39                     | 1.36%               | 3.52                     | 1.69E-02                                              |
| S     | 4.15                    | 77.9   | 10.5   | 1.16E-02              | 1.40                     | 3.54%               | 3.47                     | 2.50E-02                                              |
| SW    | 4.34                    | 80.1   | 9.64   | 7.61E-03              | 0.96                     | 6.54%               | 3.07                     | 3.19E-02                                              |
| W     | 4.87                    | 75.1   | 10.1   | 6.21E-03              | 0.94                     | 10.4%               | 3.05                     | 2.97E-02                                              |
| NW    | 3.71                    | 70.2   | 9.06   | 6.65E-03              | 1.06                     | 8.01%               | 3.26                     | 1.84E-02                                              |

61

| DENUB | WS (m s <sup>-1</sup> ) | RH (%) | T (°C) | CS (s <sup>-1</sup> ) | NPF probability (%) | GR (nm h <sup>-1</sup> ) | J <sub>10</sub> (N cm <sup>-3</sup> s <sup>-1</sup> ) |
|-------|-------------------------|--------|--------|-----------------------|---------------------|--------------------------|-------------------------------------------------------|
| N     | 3.45                    | 72.8   | 7.86   | 1.07E-02              | 3.14%               | 3.28                     | 1.95E-02                                              |
| NE    | 3.92                    | 74.2   | 8.36   | 1.32E-02              | 1.81%               | 3.36                     | 2.74E-02                                              |
| E     | 3.93                    | 74.2   | 9.19   | 1.67E-02              | 1.85%               | 3.21                     | 2.63E-02                                              |
| SE    | 3.93                    | 74.1   | 10.5   | 2.06E-02              | 2.05%               | 3.31                     | 2.52E-02                                              |
| S     | 4.16                    | 77.9   | 10.6   | 1.70E-02              | 2.01%               | 3.22                     | 2.45E-02                                              |
| SW    | 4.34                    | 80.0   | 9.69   | 1.27E-02              | 3.04%               | 3.02                     | 1.69E-02                                              |
| W     | 4.87                    | 75.0   | 10.1   | 1.04E-02              | 7.76%               | 2.94                     | 2.27E-02                                              |
| NW    | 3.71                    | 70.2   | 9.10   | 1.04E-02              | 5.20%               | 3.47                     | 2.90E-02                                              |

62

| DENRO | WS (m s <sup>-1</sup> ) | RH (%) | T (°C) | CS (s <sup>-1</sup> ) | OC (µg m <sup>-3</sup> ) | NPF probability (%) | GR (nm h <sup>-1</sup> ) | J <sub>10</sub> (N cm <sup>-3</sup> s <sup>-1</sup> ) |
|-------|-------------------------|--------|--------|-----------------------|--------------------------|---------------------|--------------------------|-------------------------------------------------------|
| N     | 3.47                    | 72.7   | 8.02   | 2.46E-02              | 2.42                     | 1.92%               | 4.33                     | 5.46E-02                                              |
| NE    | 3.92                    | 74.3   | 8.56   | 3.62E-02              | 2.91                     | 2.41%               | 5.27                     | 1.04E-01                                              |
| E     | 3.92                    | 74.4   | 9.50   | 3.46E-02              | 3.43                     | 2.95%               | 5.02                     | 1.07E-01                                              |
| SE    | 3.90                    | 74.3   | 10.9   | 3.53E-02              | 3.30                     | 2.16%               | 5.16                     | 1.23E-01                                              |
| S     | 4.15                    | 77.9   | 10.7   | 3.18E-02              | 2.51                     | 2.57%               | 4.56                     | 7.35E-02                                              |
| SW    | 4.34                    | 80.2   | 9.91   | 3.08E-02              | 2.17                     | 2.81%               | 4.00                     | 5.76E-02                                              |
| W     | 4.84                    | 75.0   | 10.3   | 2.36E-02              | 2.12                     | 7.44%               | 3.95                     | 7.09E-02                                              |
| NW    | 3.72                    | 70.2   | 9.36   | 2.79E-02              | 2.20                     | 3.49%               | 5.02                     | 8.74E-02                                              |

63

| GERRU | WS (m s <sup>-1</sup> ) | RH (%) | T (°C) | CS (s <sup>-1</sup> ) | OC (µg m <sup>-3</sup> ) | NPF probability (%) | GR (nm h <sup>-1</sup> ) | J <sub>10</sub> (N cm <sup>-3</sup> s <sup>-1</sup> ) |
|-------|-------------------------|--------|--------|-----------------------|--------------------------|---------------------|--------------------------|-------------------------------------------------------|
| N     | 2.00                    | 84.5   | 9.08   | 7.47E-03              | 2.68                     | 13.0%               | 4.40                     | 7.21E-02                                              |
| NE    | 2.19                    | 81.9   | 8.86   | 9.30E-03              | 3.47                     | 21.6%               | 4.47                     | 8.48E-02                                              |
| E     | 2.08                    | 77.5   | 10.3   | 9.30E-03              | 3.34                     | 25.0%               | 4.61                     | 1.17E-01                                              |
| SE    | 1.64                    | 81.3   | 11.2   | 7.90E-03              | 2.18                     | 21.9%               | 4.41                     | 1.08E-01                                              |
| S     | 2.45                    | 81.6   | 10.8   | 6.48E-03              | 1.89                     | 13.8%               | 4.33                     | 1.23E-01                                              |
| SW    | 3.24                    | 82.7   | 10.3   | 6.49E-03              | 1.66                     | 10.9%               | 4.29                     | 1.02E-01                                              |
| W     | 3.23                    | 81.7   | 10.5   | 5.05E-03              | 1.38                     | 12.5%               | 3.81                     | 4.81E-02                                              |
| NW    | 2.35                    | 79.7   | 11.8   | 5.28E-03              | 1.55                     | 10.3%               | 4.27                     | 3.53E-02                                              |

64

65

| <b>GERUB</b> | <b>WS (m s<sup>-1</sup>)</b> | <b>RH (%)</b> | <b>T (°C)</b> | <b>CS (s<sup>-1</sup>)</b> | <b>NPF probability (%)</b> | <b>GR (nm h<sup>-1</sup>)</b> | <b>J<sub>10</sub>(N cm<sup>-3</sup> s<sup>-1</sup>)</b> |
|--------------|------------------------------|---------------|---------------|----------------------------|----------------------------|-------------------------------|---------------------------------------------------------|
| N            | 1.99                         | 84.3          | 9.18          | 8.67E-03                   | 13.8%                      | 4.21                          | 7.86E-02                                                |
| NE           | 2.19                         | 82.1          | 8.73          | 1.00E-02                   | 26.7%                      | 4.58                          | 6.74E-02                                                |
| E            | 2.07                         | 77.3          | 10.4          | 1.14E-02                   | 28.4%                      | 4.67                          | 1.05E-01                                                |
| SE           | 1.64                         | 81.1          | 11.3          | 1.12E-02                   | 22.9%                      | 4.04                          | 1.31E-01                                                |
| S            | 2.45                         | 81.4          | 10.9          | 9.99E-03                   | 11.4%                      | 3.96                          | 1.87E-01                                                |
| SW           | 3.22                         | 82.8          | 10.3          | 8.64E-03                   | 8.7%                       | 3.97                          | 1.35E-01                                                |
| W            | 3.21                         | 81.6          | 10.6          | 6.82E-03                   | 12.5%                      | 3.66                          | 6.84E-02                                                |
| NW           | 2.38                         | 79.8          | 11.7          | 6.72E-03                   | 11.1%                      | 4.08                          | 3.76E-02                                                |

66

| <b>GERRO</b> | <b>WS (m s<sup>-1</sup>)</b> | <b>RH (%)</b> | <b>T (°C)</b> | <b>CS (s<sup>-1</sup>)</b> | <b>NPF probability (%)</b> | <b>GR (nm h<sup>-1</sup>)</b> | <b>J<sub>10</sub>(N cm<sup>-3</sup> s<sup>-1</sup>)</b> |
|--------------|------------------------------|---------------|---------------|----------------------------|----------------------------|-------------------------------|---------------------------------------------------------|
| N            | 2.10                         | 81.6          | 9.84          | 1.55E-02                   | 2.69%                      | 4.94                          | 6.71E-02                                                |
| NE           | 2.09                         | 79.8          | 9.10          | 1.59E-02                   | 7.32%                      | 4.97                          | 1.30E-01                                                |
| E            | 1.75                         | 72.6          | 12.4          | 1.54E-02                   | 15.5%                      | 4.92                          | 1.23E-01                                                |
| SE           | 1.62                         | 77.1          | 11.9          | 1.40E-02                   | 10.4%                      | 5.05                          | 1.73E-01                                                |
| S            | 2.05                         | 80.1          | 10.9          | 8.95E-03                   | 3.36%                      | 5.36                          | 1.90E-01                                                |
| SW           | 2.99                         | 78.7          | 11.3          | 8.41E-03                   | 3.17%                      | 5.53                          | 1.24E-01                                                |
| W            | 2.85                         | 77.5          | 12.0          | 1.17E-02                   | 5.72%                      | 5.31                          | 1.04E-01                                                |
| NW           | 2.70                         | 79.9          | 11.5          | 1.32E-02                   | 4.50%                      | 5.12                          | 1.25E-01                                                |

67

| <b>FINRU</b> | <b>WS (m s<sup>-1</sup>)</b> | <b>RH (%)</b> | <b>T (°C)</b> | <b>CS (s<sup>-1</sup>)</b> | <b>NPF probability (%)</b> | <b>GR (nm h<sup>-1</sup>)</b> | <b>J<sub>10</sub>(N cm<sup>-3</sup> s<sup>-1</sup>)</b> |
|--------------|------------------------------|---------------|---------------|----------------------------|----------------------------|-------------------------------|---------------------------------------------------------|
| N            | 1.96                         | 73.7          | 3.20          | 1.82E-03                   | 14.6%                      | 2.98                          | 7.20E-03                                                |
| NE           | 1.37                         | 80.0          | 1.84          | 1.95E-03                   | 10.9%                      | 3.21                          | 1.54E-02                                                |
| E            | 0.98                         | 81.8          | 3.21          | 2.49E-03                   | 7.10%                      | 3.09                          | 1.41E-02                                                |
| SE           | 1.19                         | 83.4          | 4.66          | 2.97E-03                   | 4.49%                      | 3.08                          | 1.47E-02                                                |
| S            | 1.19                         | 82.8          | 6.11          | 2.60E-03                   | 5.20%                      | 2.93                          | 9.35E-03                                                |
| SW           | 1.39                         | 78.5          | 6.99          | 2.23E-03                   | 8.42%                      | 2.97                          | 1.39E-02                                                |
| W            | 1.26                         | 78.0          | 4.75          | 1.75E-03                   | 12.3%                      | 2.61                          | 1.23E-02                                                |
| NW           | 1.88                         | 73.9          | 3.41          | 1.78E-03                   | 18.5%                      | 2.91                          | 9.58E-03                                                |

68

| <b>FINUB</b> | <b>WS (m s<sup>-1</sup>)</b> | <b>RH (%)</b> | <b>T (°C)</b> | <b>CS (s<sup>-1</sup>)</b> | <b>NPF probability (%)</b> | <b>GR (nm h<sup>-1</sup>)</b> | <b>J<sub>10</sub>(N cm<sup>-3</sup> s<sup>-1</sup>)</b> |
|--------------|------------------------------|---------------|---------------|----------------------------|----------------------------|-------------------------------|---------------------------------------------------------|
| N            | 2.95                         | 72.1          | 4.31          | 5.49E-03                   | 8.06%                      | 2.61                          | 2.85E-02                                                |
| NE           | 2.86                         | 77.5          | 3.17          | 6.82E-03                   | 5.11%                      | 2.67                          | 3.66E-02                                                |
| E            | 3.26                         | 77.2          | 7.09          | 7.48E-03                   | 1.57%                      | 3.66                          | 2.60E-02                                                |
| SE           | 3.29                         | 76.9          | 7.08          | 6.82E-03                   | 1.73%                      | 4.18                          | 2.84E-02                                                |
| S            | 3.77                         | 81.0          | 6.98          | 6.67E-03                   | 1.44%                      | 4.14                          | 3.55E-02                                                |
| SW           | 4.14                         | 79.0          | 9.34          | 4.86E-03                   | 1.92%                      | 3.21                          | 1.39E-02                                                |
| W            | 3.59                         | 77.5          | 6.72          | 7.96E-03                   | 7.53%                      | 2.67                          | 2.38E-02                                                |
| NW           | 3.13                         | 70.2          | 5.52          | 4.51E-03                   | 13.3%                      | 2.78                          | 2.17E-02                                                |

69

70

| <b>FINRO</b> | <b>WS (m s<sup>-1</sup>)</b> | <b>RH (%)</b> | <b>T (°C)</b> | <b>CS (s<sup>-1</sup>)</b> | <b>NPF probability (%)</b> | <b>GR (nm h<sup>-1</sup>)</b> | <b>J<sub>10</sub>(N cm<sup>-3</sup> s<sup>-1</sup>)</b> |
|--------------|------------------------------|---------------|---------------|----------------------------|----------------------------|-------------------------------|---------------------------------------------------------|
| N            | 3.89                         | 66.8          | 5.54          | 7.38E-03                   | 9.31%                      | 4.06                          | 6.21E-02                                                |
| NE           | 3.74                         | 71.2          | 2.75          | 6.64E-03                   | 8.52%                      | 3.44                          | 5.52E-02                                                |
| E            | 4.21                         | 70.3          | 9.30          | 7.87E-03                   | 6.22%                      | 3.75                          | 4.29E-02                                                |
| SE           | 4.23                         | 72.3          | 7.94          | 9.41E-03                   | 3.69%                      | 4.00                          | 6.76E-02                                                |
| S            | 4.62                         | 74.8          | 7.71          | 1.04E-02                   | 1.81%                      | 3.47                          | 1.23E-01                                                |
| SW           | 4.64                         | 72.1          | 10.1          | 9.90E-03                   | 3.22%                      | 3.48                          | 8.51E-02                                                |
| W            | 4.12                         | 72.4          | 8.07          | 9.64E-03                   | 3.27%                      | 3.83                          | 8.64E-02                                                |
| NW           | 4.23                         | 67.0          | 6.61          | 8.44E-03                   | 4.47%                      | 3.99                          | 7.07E-02                                                |

71

| <b>SPARU</b> | <b>WS (m s<sup>-1</sup>)</b> | <b>RH (%)</b> | <b>T (°C)</b> | <b>CS (s<sup>-1</sup>)</b> | <b>NPF probability (%)</b> | <b>GR (nm h<sup>-1</sup>)</b> | <b>J<sub>10</sub>(N cm<sup>-3</sup> s<sup>-1</sup>)</b> |
|--------------|------------------------------|---------------|---------------|----------------------------|----------------------------|-------------------------------|---------------------------------------------------------|
| N            | 0.46                         | 72.3          | 13.0          | 4.64E-03                   | 12.8%                      | 3.57                          | 2.54E-02                                                |
| NE           | 0.26                         | 72.1          | 13.1          | 5.00E-03                   | 10.9%                      | 3.67                          | 8.75E-03                                                |
| E            | 0.37                         | 72.2          | 13.7          | 5.26E-03                   | 10.8%                      | 3.91                          | 1.74E-02                                                |
| SE           | 1.47                         | 64.8          | 18.0          | 7.43E-03                   | 9.28%                      | 3.97                          | 1.48E-02                                                |
| S            | 0.93                         | 58.7          | 17.1          | 6.46E-03                   | 10.7%                      | 3.68                          | 1.67E-02                                                |
| SW           | 0.45                         | 60.9          | 13.7          | 4.45E-03                   | 14.0%                      | 3.23                          | 2.07E-02                                                |
| W            | 0.59                         | 59.0          | 13.6          | 4.33E-03                   | 17.5%                      | 3.62                          | 1.94E-02                                                |
| NW           | 0.99                         | 64.5          | 12.8          | 4.19E-03                   | 16.7%                      | 3.52                          | 1.23E-02                                                |

72

| <b>SPAUB</b> | <b>WS (m s<sup>-1</sup>)</b> | <b>RH (%)</b> | <b>T (°C)</b> | <b>CS (s<sup>-1</sup>)</b> | <b>NPF probability (%)</b> | <b>GR (nm h<sup>-1</sup>)</b> | <b>J<sub>10</sub>(N cm<sup>-3</sup> s<sup>-1</sup>)</b> |
|--------------|------------------------------|---------------|---------------|----------------------------|----------------------------|-------------------------------|---------------------------------------------------------|
| N            | 1.24                         | 73.8          | 15.9          | 1.14E-02                   | 9.22%                      | 3.02                          | 8.62E-03                                                |
| NE           | 2.56                         | 79.0          | 17.1          | 9.39E-03                   | 5.49%                      | 3.30                          | 2.63E-02                                                |
| E            | 2.80                         | 74.2          | 20.1          | 9.71E-03                   | 6.83%                      | 3.25                          | 1.40E-02                                                |
| SE           | 1.94                         | 68.5          | 21.2          | 1.19E-02                   | 8.42%                      | 2.79                          | 2.13E-02                                                |
| S            | 1.63                         | 63.6          | 22.3          | 1.22E-02                   | 12.4%                      | 3.32                          | 3.35E-02                                                |
| SW           | 1.60                         | 65.9          | 21.6          | 1.13E-02                   | 12.3%                      | 3.91                          | 2.59E-02                                                |
| W            | 2.37                         | 65.9          | 16.3          | 9.12E-03                   | 21.5%                      | 3.30                          | 2.12E-02                                                |
| NW           | 2.30                         | 64.1          | 14.4          | 7.52E-03                   | 22.0%                      | 3.50                          | 9.87E-03                                                |

73

| <b>GRERU</b> | <b>WS (m s<sup>-1</sup>)</b> | <b>RH (%)</b> | <b>T (°C)</b> | <b>CS (s<sup>-1</sup>)</b> | <b>OC (µg m<sup>-3</sup>)</b> | <b>NPF probability (%)</b> | <b>GR (nm h<sup>-1</sup>)</b> | <b>J<sub>10</sub>(N cm<sup>-3</sup> s<sup>-1</sup>)</b> |
|--------------|------------------------------|---------------|---------------|----------------------------|-------------------------------|----------------------------|-------------------------------|---------------------------------------------------------|
| N            | 6.23                         | 72.3          | 17.0          | 3.75E-03                   | 1.39                          | 5.51%                      | 2.99                          | 4.65E-03                                                |
| NE           | 2.52                         | 68.8          | 19.6          | 3.78E-03                   | 1.42                          | 5.87%                      | 2.34                          | 1.71E-03                                                |
| E            | 3.36                         | 70.6          | 18.7          | 3.82E-03                   | 1.47                          | 3.37%                      | 2.68                          | 5.41E-03                                                |
| SE           | 8.44                         | 65.5          | 18.1          | 3.28E-03                   | 1.58                          | 5.15%                      | 3.60                          | 2.38E-03                                                |
| S            | 4.44                         | 69.9          | 17.6          | 3.10E-03                   | 1.53                          | 5.25%                      | 3.54                          | 3.84E-02                                                |
| SW           | 5.20                         | 72.7          | 19.0          | 4.43E-03                   | 1.79                          | 5.56%                      | 3.63                          | 1.23E-02                                                |
| W            | 6.39                         | 69.5          | 21.1          | 5.41E-03                   | 1.86                          | 6.68%                      | 3.97                          | 2.69E-03                                                |
| NW           | 7.08                         | 67.9          | 17.7          | 4.51E-03                   | 1.53                          | 10.3%                      | 3.42                          | 5.25E-03                                                |

74

75

| <b>GREUB</b> | <b>WS (m s<sup>-1</sup>)</b> | <b>RH (%)</b> | <b>T (°C)</b> | <b>CS (s<sup>-1</sup>)</b> | <b>NPF probability (%)</b> | <b>GR (nm h<sup>-1</sup>)</b> | <b>J<sub>10</sub>(N cm<sup>-3</sup> s<sup>-1</sup>)</b> |
|--------------|------------------------------|---------------|---------------|----------------------------|----------------------------|-------------------------------|---------------------------------------------------------|
| N            | 1.90                         | 48.8          | 7.28          | 7.57E-03                   | 9.35%                      | 3.20                          | 3.62E-02                                                |
| NE           | 2.54                         | 55.2          | 17.6          | 6.29E-03                   | 4.82%                      | 3.30                          | 3.86E-02                                                |
| E            | 1.56                         | 60.7          | 22.3          | 7.12E-03                   | 4.73%                      | 3.69                          | 3.33E-02                                                |
| SE           | 1.99                         | 64.6          | 21.1          | 7.61E-03                   | 7.44%                      | 3.57                          | 1.38E-02                                                |
| S            | 0.88                         | 68.5          | 17.3          | 8.23E-03                   | 7.78%                      | 3.62                          | 4.53E-02                                                |
| SW           | 1.55                         | 65.0          | 17.4          | 7.53E-03                   | 8.61%                      | 3.87                          | 4.44E-02                                                |
| W            | 2.05                         | 53.5          | 16.4          | 9.01E-03                   | 10.6%                      | 3.98                          | 5.07E-02                                                |
| NW           | 1.30                         | 51.8          | 20.6          | 1.01E-02                   | 11.8%                      | 3.99                          | 6.56E-02                                                |

76

77

78 **Table S8:** Average conditions for local and region-wide events (\*refers to NO<sub>2</sub>).

| Site |    | WS (m s <sup>-1</sup> ) |             | T (°C)      |             | RH (%)      |             | SR (W m <sup>-2</sup> ) |            |
|------|----|-------------------------|-------------|-------------|-------------|-------------|-------------|-------------------------|------------|
|      |    | Local                   | Regional    | Local       | Regional    | Local       | Regional    | Local                   | Regional   |
| DEN  | RU | 4.20 ± 1.29             | 4.72 ± 1.34 | 14.1 ± 4.51 | 10.6 ± 4.05 | 65 ± 9.51   | 65.6 ± 8.90 | 223 ± 69.3              | 197 ± 76.1 |
|      | UB | 4.54 ± 1.47             | 4.72 ± 1.34 | 12.2 ± 5.49 | 10.6 ± 4.05 | 64.3 ± 10.4 | 65.6 ± 8.90 | 210 ± 76.8              | 197 ± 76.1 |
| GER  | RU | 2.18 ± 1.59             | 1.97 ± 1.50 | 14.6 ± 8.44 | 15.9 ± 7.64 | 74.4 ± 20.2 | 69.2 ± 21.8 | 196 ± 247               | 251 ± 287  |
|      | UB | 2.12 ± 1.55             | 1.97 ± 1.50 | 15.6 ± 8.14 | 15.9 ± 7.64 | 72.5 ± 21.3 | 69.2 ± 21.8 | 225 ± 269               | 251 ± 287  |
| FIN  | RU | 1.37 ± 1.02             | 1.67 ± 1.12 | 4.3 ± 7.69  | 0.87 ± 5.93 | 64.7 ± 21.5 | 64.3 ± 19.8 | 153 ± 202               | 148 ± 197  |
|      | UB | 3.38 ± 1.89             | 3.14 ± 1.54 | 6.25 ± 6.15 | 3.75 ± 5.24 | 65.4 ± 17.6 | 56.4 ± 17.5 | 142 ± 206               | 168 ± 224  |
| SPA  | RU | 1.16 ± 0.51             | 1.07 ± 0.25 | 11.8 ± 4.76 | 13.6 ± 5.41 | 63.2 ± 12.2 | 55.2 ± 13.1 | 149 ± 66.3              | 167 ± 65.1 |
|      | UB | 2.49 ± 1.06             | 3.13 ± 0.80 | 17.9 ± 5.41 | 17.5 ± 4.99 | 58.6 ± 9.44 | 54.2 ± 10.2 | 199 ± 77.3              | 194 ± 69.7 |

79

| Site |    | CS (s <sup>-1</sup> ) |                     | GR (nm h <sup>-1</sup> ) |             | J <sub>10</sub> (N cm <sup>-3</sup> s <sup>-1</sup> ) |                     |
|------|----|-----------------------|---------------------|--------------------------|-------------|-------------------------------------------------------|---------------------|
|      |    | Local                 | Regional            | Local                    | Regional    | Local                                                 | Regional            |
| DEN  | RU | 9.03E-03 ± 5.69E-03   | 6.94E-03 ± 3.84E-03 | 3.26 ± 1.49              | 2.89 ± 1.12 | 2.39E-02 ± 3.27E-02                                   | 2.00E-02 ± 2.45E-02 |
|      | UB | 1.17E-02 ± 6.35E-03   | 1.01E-02 ± 3.86E-03 | 3.36 ± 1.59              | 2.78 ± 0.92 | 2.67E-02 ± 4.01E-02                                   | 2.16E-02 ± 2.76E-02 |
| GER  | RU | 7.36E-03 ± 3.42E-03   | 9.42E-03 ± 4.22E-03 | 4.11 ± 1.71              | 4.48 ± 1.71 | 7.58E-02 ± 3.76E-02                                   | 1.02E-01 ± 1.65E-01 |
|      | UB | 9.63E-03 ± 1.03E-02   | 1.01E-02 ± 5.24E-03 | 4.19 ± 1.71              | 4.27 ± 1.66 | 1.00E-01 ± 2.02E-01                                   | 1.03E-01 ± 2.28E-01 |
| FIN  | RU | 2.26E-03 ± 1.33E-03   | 1.85E-03 ± 1.17E-03 | 2.96 ± 1.76              | 2.75 ± 1.37 | 1.03E-02 ± 1.82E-02                                   | 1.29E-02 ± 2.34E-02 |
|      | UB | 4.46E-03 ± 3.16E-03   | 4.04E-03 ± 2.70E-03 | 3.06 ± 1.53              | 2.60 ± 0.87 | 2.19E-02 ± 3.33E-02                                   | 2.45E-02 ± 3.67E-02 |
| SPA  | RU | 4.00E-03 ± 2.13E-03   | 4.30E-03 ± 1.59E-03 | 3.98 ± 2.22              | 3.38 ± 1.32 | 1.32E-02 ± 1.74E-02                                   | 1.32E-02 ± 1.68E-02 |
|      | UB | 8.92E-03 ± 3.60E-03   | 6.66E-03 ± 2.12E-03 | 3.37 ± 1.56              | 3.31 ± 0.81 | 2.28E-02 ± 2.67E-02                                   | 1.44E-02 ± 1.42E-02 |

80

| Site |    | NO <sub>x</sub> / NO <sub>2</sub> (μg m <sup>-3</sup> ) |              | O <sub>3</sub> (μg m <sup>-3</sup> ) |             | SO <sub>2</sub> (μg m <sup>-3</sup> ) |             |
|------|----|---------------------------------------------------------|--------------|--------------------------------------|-------------|---------------------------------------|-------------|
|      |    | Local                                                   | Regional     | Local                                | Regional    | Local                                 | Regional    |
| DEN  | RU | 2.65 ± 1.73                                             | 2.35 ± 1.23  | 36.6 ± 6.37                          | 38.3 ± 4.91 | 0.19 ± 0.21                           | 0.14 ± 0.07 |
|      | UB | 6.89 ± 2.96                                             | 5.89 ± 2.24  | 35.3 ± 5.78                          | 35.7 ± 5.09 | -                                     | -           |
| GER  | RU | -                                                       | -            | -                                    | -           | -                                     | -           |
|      | UB | -                                                       | -            | -                                    | -           | -                                     | -           |
| FIN  | RU | 0.51 ± 0.54                                             | 0.51 ± 0.59  | 33.4 ± 8.59                          | 35.6 ± 6.63 | 0.13 ± 0.27                           | 0.13 ± 0.19 |
|      | UB | -                                                       | -            | -                                    | -           | -                                     | -           |
| SPA  | RU | 2.38 ± 1.01*                                            | 2.74 ± 0.66* | 72.2 ± 8.54                          | 81.4 ± 14.2 | 0.95 ± 0.89                           | 0.90 ± 0.66 |
|      | UB | 26.5 ± 13.1*                                            | 19.6 ± 7.21* | 59.2 ± 15.8                          | 67.6 ± 15.4 | 1.94 ± 0.81                           | 1.94 ± 0.93 |

81

82

83



84

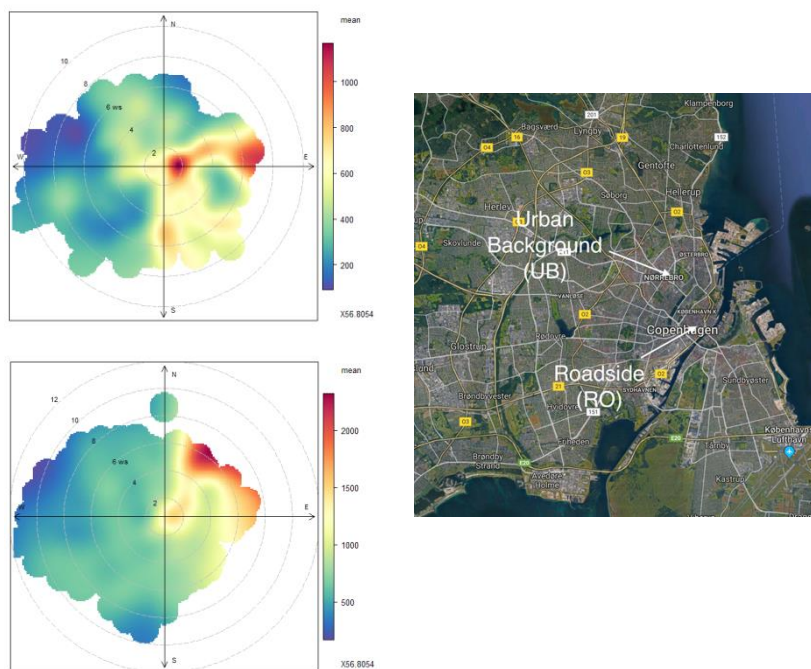

85

86

87 **Figure S1:** Sources of 56 nm particles at DENUB and DENRO (map provided by ©Google Maps).

88

89

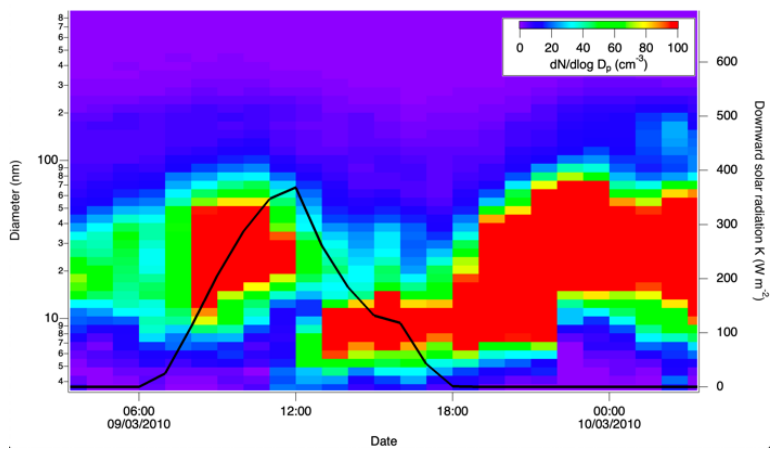

90

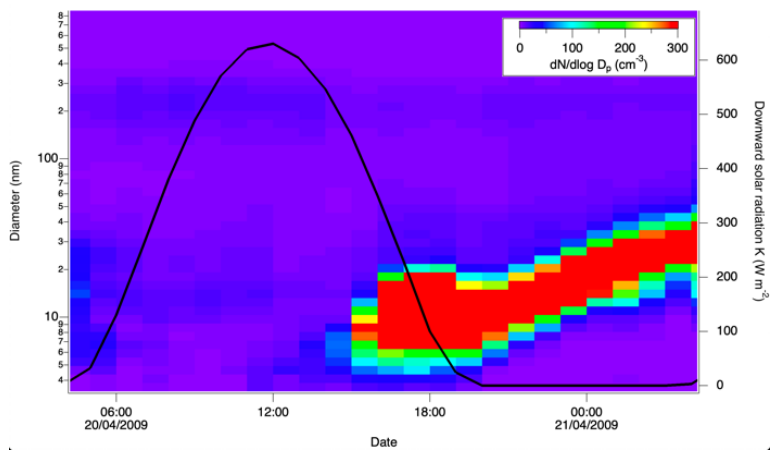

91

92

93

94

**Figure S2:** Examples of NPF events with late growth of the particles at FINRU.

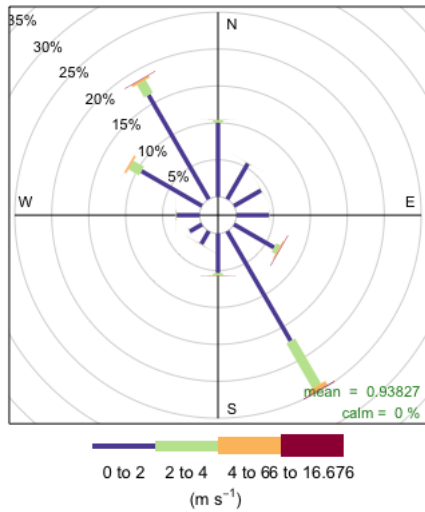

95 **Frequency of counts by wind direction (%)**

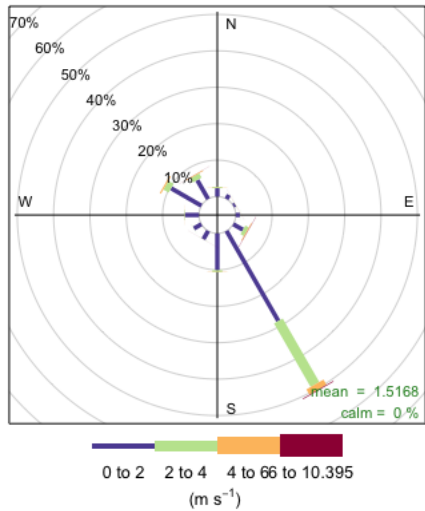

96 **Frequency of counts by wind direction (%)**

97  
 98 **Figure S3:** Average wind profile (top panel) and wind profile for the time window 9:00 to 15:00  
 99 (bottom panel) for SPARU.

100
